# Supplementary material
Source: Research Square preprint supplement (doi:10.21203/rs.3.rs-9592028/v1)
Supplement: Supplementary file 1 [file 309d0ce9326d9a8160a7ce8b.xlsx]

## Sheet: Fig.2 a
	1 copy Exp.1	1 copy Exp.2	Ave	STD dev
Time	PAPS	PAPS
0.5	0.822411	0.417181	0.619796	0.202615
3	5.37108	3.25688	4.31398	1.0571
5	4.22112	5.34726	4.78419	0.563072
7	6.55988	5.84764	6.20376	0.356123
10	10.4215	5.4327	7.92708	2.49438
15	12.2299	6.22056	9.22524	3.00468
18	12.8279	6.57059	9.69925	3.12866
21	12.9936	6.65373	9.82368	3.16995
24	11.8492	6.11032	8.97975	2.86943
27	11.7093	6.10467	8.90698	2.80231
30	11.6516	6.25012	8.95085	2.70073
33	11.4868	5.99312	8.73995	2.74683
48	9.90006	4.99639	7.44823	2.45184
	2 ccopy Exp.1	2 ccopy Exp.2
Time	PAPS	PAPS
0.5	0.822411	1.51739	1.1699	0.347491
3	0.822411	0.822411	0.822411	0
5	8.15944	7.54543	7.85244	0.307007
7	8.63676	8.49244	8.5646	0.0721625
10	8.21143	8.12051	8.16597	0.04546
15	24.1197	22.9206	23.5201	0.599562
18	25.9497	24.9965	25.4731	0.476589
21	27.4122	25.413	26.4126	0.99962
24	26.085	24.093	25.089	0.995978
27	26.3332	24.5521	25.4426	0.89057
30	26.9515	24.8247	25.8881	1.06342
33	27.1085	24.5256	25.8171	1.29147
48	23.3572	21.6105	22.4839	0.87334

## Sheet: Fig.2 d,e
	NST 100 Exp.1			NST 100 Exp.2			NST 100 ave			PAPS		PAPS		Dev
Time	amine	0S	NS	amine	0S	NS	amine	0S	NS	Exp.1	Exp.2	ave	dev	amine	0S	NS
0	82.266	16.081	1.653	83.26	16.368	0.372	82.763	16.2245	1.0125
3	42.35	14.195	43.454	40.926	14.148	44.925	41.638	14.1715	44.1895	1.078	1.005	1.0415	0.0365	0.712	0.0235	0.7355
5	14.817	13.049	72.135	13.637	13.921	72.442	14.227	13.485	72.2885
6	4.193	13.105	82.702	5.041	13	81.959	4.617	13.0525	82.3305	1.968	2.137	2.0525	0.0845	0.424	0.0525	0.3715
8	4.023	13.444	82.534	3.85	13.497	82.653	3.9365	13.4705	82.5935	2.917	3.24	3.0785	0.1615	0.0865	0.0265	0.0595
10	3.077	13.374	83.549	3.175	13.342	83.484	3.126	13.358	83.5165	4.527	4.361	4.444	0.083	0.049	0.016	0.0325
12	3.532	13.496	82.971	3.304	13.617	83.079	3.418	13.5565	83.025	5.124	5.328	5.226	0.102	0.114	0.0605	0.054
14	3.413	13.722	82.865	5.257	15.838	78.905	4.335	14.78	80.885	5.585	5.753	5.669	0.084	0.922	1.058	1.98
16	2.115	13.656	84.229	3.038	13.465	83.497	2.5765	13.5605	83.863	5.367	6.008	5.6875	0.3205	0.4615	0.0955	0.366
18	0.473	13.104	86.423	0.531	14.072	85.397	0.502	13.588	85.91	7.033	8.293	7.663	0.63	0.029	0.484	0.513
21	2.797	13.335	83.868	2.921	13.93	83.149	2.859	13.6325	83.5085	7.067	9.193	8.13	1.063	0.062	0.2975	0.3595
24	0.453	12.94	86.607	0.403	13.968	85.628	0.428	13.454	86.1175	6.762	9.465	8.1135	1.3515	0.025	0.514	0.4895
	NST 50 Exp.1			NST 50 Exp.2			NST 50 ave			PAPS		PAPS		Dev
Time	amine	0S	NS	amine	0S	NS	amine	0S	NS	Exp.1	Exp.2	ave	dev	amine	0S	NS
0	83.657	16.104	0.239	83.775	16.033	0.192	83.716	16.0685	0.2155
3	55.292	14.795	29.913	58.468	13.469	28.063	56.88	14.132	28.988	1.466	1.374	1.42	0.046	1.588	0.663	0.925
5	33.821	13.253	52.926	37.038	14.207	48.755	35.4295	13.73	50.8405
6	14.605	13.627	71.768	16.627	13.14	70.233	15.616	13.3835	71.0005	1.796	1.777	1.7865	0.0095	1.011	0.2435	0.7675
8	5.501	13.743	80.756	6.152	13.73	80.119	5.8265	13.7365	80.4375	3.056	3.131	3.0935	0.0375	0.3255	0.0065	0.3185
10	3.797	13.496	82.708	4.429	13.926	81.645	4.113	13.711	82.1765	4.648	4.79	4.719	0.071	0.316	0.215	0.5315
12	4.196	13.826	81.977	4.224	13.572	82.204	4.21	13.699	82.0905	5.298	5.021	5.1595	0.1385	0.014	0.127	0.1135
14	4.12	14.157	81.723	4.148	14.122	81.73	4.134	14.1395	81.7265	5.845	6.026	5.9355	0.0905	0.014	0.0175	0.0035
16	3.58	13.66	82.76	3.406	13.54	83.055	3.493	13.6	82.9075	6.662	6.626	6.644	0.018	0.087	0.06	0.1475
18	3.706	13.758	82.535	3.518	13.789	82.692	3.612	13.7735	82.6135	8.832	8.897	8.8645	0.0325	0.094	0.0155	0.0785
21	3.216	14.223	82.561	3.56	13.988	82.453	3.388	14.1055	82.507	9.927	9.673	9.8	0.127	0.172	0.1175	0.054
24	3.668	13.839	82.493	3.661	13.825	82.514	3.6645	13.832	82.5035	10.048	10.339	10.1935	0.1455	0.0035	0.007	0.0105
	NST 25 Exp.1			NST 25 Exp.2			NST 25 ave			PAPS		PAPS		Dev
Time	amine	0S	NS	amine	0S	NS	amine	0S	NS	Exp.1	Exp.2	ave	dev	amine	0S	NS
0	82.845	16.071	1.085	83.733	16.084	0.183	83.289	16.0775	0.634
3	63.42	14.989	21.591	63.979	15.503	20.517	63.6995	15.246	21.054	3.261	3.424	3.3425	0.0815	0.2795	0.257	0.537
5	51.803	14.388	33.809	54.411	14.92	30.669	53.107	14.654	32.239
6	36.546	14.315	49.139	32.908	14.35	52.742	34.727	14.3325	50.9405	3.88	3.92	3.9	0.02	1.819	0.0175	1.8015
8	18.298	13.752	67.949	15.15	14.19	70.659	16.724	13.971	69.304	4.312	4.6	4.456	0.144	1.574	0.219	1.355
10	10.126	14.155	75.719	8.367	13.938	77.695	9.2465	14.0465	76.707	5.63	6.017	5.8235	0.1935	0.8795	0.1085	0.988
12	6.711	14.375	78.914	6.232	14.413	79.355	6.4715	14.394	79.1345	6.553	6.794	6.6735	0.1205	0.2395	0.019	0.2205
14	5.596	14.421	79.983	5.66	15.489	78.851	5.628	14.955	79.417	8.455	7.95	8.2025	0.2525	0.032	0.534	0.566
16	4.636	14.163	81.201	4.451	14.041	81.509	4.5435	14.102	81.355	8.619	8.366	8.4925	0.1265	0.0925	0.061	0.154
18	4.586	13.942	81.472	3.039	14.43	82.531	3.8125	14.186	82.0015	11.167	10.84	11.0035	0.1635	0.7735	0.244	0.5295
21	4.496	15.232	80.271	4.113	14.696	81.191	4.3045	14.964	80.731	11.986	11.777	11.8815	0.1045	0.1915	0.268	0.46
24	4.315	13.777	81.908	2.248	12.587	85.165	3.2815	13.182	83.5365	12.197	11.651	11.924	0.273	1.0335	0.595	1.6285

## Sheet: Fig. 3 b,c,d,e
	NH2							0S							NS
Time	Exp.1	Exp. 2	Exp. 3	Exp. 4	Ave	Std		Exp.1	Exp. 2	Exp. 3	Exp. 4	Ave	Std		Exp.1	Exp. 2	Exp. 3	Exp. 4	Ave	Std
0	78.9443	80.2096	78.761	78.4341	79.0873	0.673273		19.3063	18.077	19.4398	19.598	19.1052	0.602581		1.74947	1.71339	1.79917	1.96794	1.80749	0.0975128
6
15	35.8319	16.0099			25.9209	9.91099		16.8611	16.8095			16.8353	0.025803		47.307	67.1806			57.2438	9.93679
18	2.93219	2.24588	2.41428	2.57624	2.54215	0.253683		16.863	17.2549	17.0923	17.3581	17.1421	0.186907		80.2048	80.4992	80.4934	80.0657	80.3158	0.187117
20	2.45319	2.19783	2.27012	2.4534	2.34363	0.112597		16.7711	16.7306	17.0138	17.035	16.8876	0.137722		80.7757	81.0716	80.7161	80.5116	80.7688	0.200391
24			2.10822	2.36948	2.23885	0.130627				16.9438	16.901	16.9224	0.021375				61.0019	61.7621	61.382	0.380089
25	2.30987	2.16517			2.23752	0.072354		16.9796	16.5683			16.774	0.205631		54.3683	56.7864			55.5774	1.20909
40	2.35499	3.27676			2.81588	0.460883		15.4218	15.3982			15.41	0.0117821		26.1897	27.0763			26.633	0.443275
42			2.25973	2.41513	2.33743	0.0776973				15.7228	15.7547	15.7388	0.0159461				27.6607	27.5647	27.6127	0.0480158
47	2.22173	2.06246			2.1421	0.0796319		14.9204	15.3115			15.1159	0.195544		23.3898	24.111			23.7504	0.360595
49			2.23167	2.28632	2.25899	0.0273269				15.0743	15.2485	15.1614	0.087066				23.85	23.6999	23.7749	0.0750647
63.5	2.23966	1.92728			2.08347	0.156193		13.5164	13.836			13.6762	0.159778		20.5502	21.0287			20.7894	0.239253
66			2.13251	2.44061	2.28656	0.154053				13.6008	13.4905	13.5457	0.0551831				21.2512	20.1926	20.7219	0.529321
71	2.01226	1.77797	2.17034	2.35335	2.07848	0.211356		13.0243	13.3686	13.1744	13.0168	13.146	0.143084		19.7966	20.2841	20.0626	19.6915	19.9587	0.231502
88	2.15336	1.83912			1.99624	0.15712		10.5273	10.907			10.7171	0.189852		15.6186	15.9923			15.8054	0.18685
90			2.16528	2.45753	2.3114	0.146125				9.60929	9.62012	9.61471	0.00541478				14.4059	14.4218	14.4138	0.0079532
98	2.44216	1.88283	1.97363	2.23659	2.1338	0.220394		6.96992	6.99664	7.06807	7.12637	7.04025	0.0613155		11.8566	11.9628	11.3104	11.4485	11.6446	0.272197
114			2.03149	2.21288	2.12218	0.0906914				5.9082	5.92584	5.91702	0.00881887				6.35588	6.35343	6.35466	0.00122559
117	2.37383	2.02561			2.19972	0.17411		5.99046	6.40672			6.19859	0.208132		6.49092	6.31379			6.40236	0.0885672
121	2.24992	2.09866	2.00629	2.16986	2.13118	0.0897921		5.76952	5.86512	5.54413	5.56342	5.68555	0.13621		5.85429	6.01943	5.40839	5.38774	5.66746	0.275749
126.5	2.07378	1.77941			1.92659	0.147183		5.53956	5.38826			5.46391	0.0756495		5.12122	5.07731			5.09927	0.0219547
128.5			2.0534	2.08918	2.07129	0.0178871				5.22348	4.84921	5.03635	0.187134				4.55459	4.56979	4.56219	0.00759804
131	1.78227	1.69155			1.73691	0.0453589		5.22059	5.02553			5.12306	0.0975304		4.7006	4.6092			4.6549	0.0457013
133	1.86836	1.68744	1.99702	2.06335	1.90404	0.143367		5.25625	5.12434	5.08931	4.73917	5.05227	0.191183		4.58136	4.48265	4.21111	4.24556	4.38017	0.15627
135	1.83895	1.74127			1.79011	0.0488375		4.53941	4.53226			4.53584	0.00357515		4.44122	4.35152			4.39637	0.044854
138			1.90386	1.97425	1.93905	0.0351931				4.96714	4.57342	4.77028	0.196861				3.88892	3.91837	3.90364	0.0147257
	6S	Pot5	135pot1	135pot2	Ave	Std		2S	Pot5	135pot1	135pot2	Ave	Std		NS6S	Pot5	135pot1	135pot2	Ave	Std
Time	Exp.1	Exp. 2	Exp. 3	Exp. 4	Ave	Std		Exp.1	Exp. 2	Exp. 3	Exp. 4	Ave	Std		Exp.1	Exp. 2	Exp. 3	Exp. 4	Ave	Std
0	0	0	0	0	0	0		0	0	0	0	0	0		0	0	0	0	0	0
6
15	0	0			0	0		0	0			0	0		0	0			0	0
18	0	0	0	0	0	0		0	0	0	0	0	0		0	0	0	0	0	0
20	0	0	0	0	0	0		0	0	0	0	0	0		0	0	0	0	0	0
24			0	0	0	0				0.18334	0.178397	0.180868	0.00247181				0	0	0	0
25	0	0			0	0		0.132536	0.216956			0.174746	0.0422103		0	0			0	0
40	0	0			0	0		1.228	1.0391			1.13355	0.09445		0	0			0	0
42			0	0	0	0				1.20931	1.13064	1.16997	0.0393344				0	0	0	0
47	0	0			0	0		2.03301	1.80247			1.91774	0.115266		0	0			0	0
49			0	0	0	0				1.94402	1.9041	1.92406	0.0199602				0	0	0	0
63.5	0	0			0	0		3.34803	3.00067			3.17435	0.173679		0	0			0	0
66			0	0	0	0				3.26325	3.48	3.37162	0.108374				0	0	0	0
71	0	0	0	0	0	0		4.03668	3.56166	3.6019	3.81341	3.75341	0.189448		0	0	0	0	0	0
88	2.44333	2.3928			2.41807	0.0252646		3.794	3.43528			3.61464	0.179359		4.27296	4.32714			4.30005	0.0270923
90			2.93081	2.74892	2.83987	0.0909473				3.35761	3.56346	3.46054	0.102925				4.65569	4.28078	4.46824	0.187456
98	5.48048	5.56224	5.29539	5.13333	5.36786	0.166377		2.86091	2.71855	2.99461	3.17785	2.93798	0.169437		7.02893	7.16798	7.75332	7.40059	7.3377	0.274243
114			5.84576	5.61618	5.73097	0.114789				2.3892	2.44473	2.41696	0.0277633				11.5067	11.2021	11.3544	0.152297
117	6.00508	5.75291			5.879	0.126084		2.0377	2.15006			2.09388	0.0561765		9.65318	9.49679			9.57499	0.0781959
121	5.64287	5.80244	5.60601	5.37315	5.60612	0.153436		1.91457	1.83698	2.02742	2.08029	1.96481	0.0950272		9.85178	9.87153	11.7955	11.4866	10.7514	0.896411
126.5	5.27829	5.7957			5.537	0.258706		1.89908	1.66566			1.78237	0.116709		9.72731	10.3375			10.0324	0.305097
128.5			5.3083	5.11806	5.21318	0.0951215				1.84264	1.87791	1.86027	0.017632				11.9568	11.6205	11.7886	0.168146
131	5.09091	5.5828			5.33686	0.245948		1.82393	1.60214			1.71303	0.110898		10.9619	11.6314			11.2967	0.334725
133	5.06424	5.59083	5.1724	4.98514	5.20315	0.233484		1.83199	1.63873	1.75386	1.80856	1.75829	0.0746191		11.1412	11.7849	11.9445	11.6357	11.6266	0.300752
135	5.00368	5.5017			5.25269	0.249008		1.76701	1.55851			1.66276	0.104248		11.0264	11.7299			11.3782	0.351783
138			5.02116	4.85401	4.93758	0.0835749				1.694	1.73452	1.71426	0.0202595				11.9069	11.6624	11.7847	0.122218
	NS2S							2S6S							TriS
Time	Exp.1	Exp. 2	Exp. 3	Exp. 4	Ave	Std		Exp.1	Exp. 2	Exp. 3	Exp. 4	Ave	Std		Exp.1	Exp. 2	Exp. 3	Exp. 4	Ave	Std
0	0	0	0	0	0	0		0	0	0	0	0	0		0	0	0	0	0	0
6
15	0	0			0	0		0	0			0	0		0	0			0	0
18	0	0	0	0	0	0		0	0	0	0	0	0		0	0	0	0	0	0
20	0	0	0	0	0	0		0	0	0	0	0	0		0	0	0	0	0	0
24			19.7627	18.789	19.2759	0.486869				0	0	0	0				0	0	0	0
25	26.2097	24.2631			25.2364	0.973311		0	0			0	0		0	0			0	0
40	54.8055	53.2097			54.0076	0.797926		0	0			0	0		0	0			0	0
42			53.1474	53.1348	53.1411	0.00629326				0	0	0	0				0	0	0	0
47	57.435	56.7126			57.0738	0.361241		0	0			0	0		0	0			0	0
49			56.9	56.8612	56.8806	0.019368				0	0	0	0				0	0	0	0
63.5	60.3457	60.2074			60.2765	0.0691594		0	0			0	0		0	0			0	0
66			59.7522	60.3964	60.0743	0.322078				0	0	0	0				0	0	0	0
71	61.1302	61.0076	60.9907	61.125	61.0634	0.0645246		0	0	0	0	0	0		0	0	0	0	0	0
88	20.6399	20.9979			20.8189	0.179002		0.155116	0.127832			0.141474	0.0136418		40.3955	39.9807			40.1881	0.207411
90			18.5747	18.6718	18.6232	0.0485589				0.203027	0.213248	0.208137	0.00511014				44.0977	44.0224	44.06	0.0376843
98	13.9724	14.3318	14.5697	14.4441	14.3295	0.222689		0.444765	0.352397	0.595286	0.645169	0.509404	0.116873		48.9438	49.0248	48.4396	48.3875	48.6989	0.287401
114			12.3297	12.1129	12.2213	0.108439				1.52635	1.68426	1.6053	0.078956				50.8552	51.1693	51.0122	0.157044
117	11.7396	12.3149			12.0273	0.287674		1.62051	1.67212			1.64632	0.0258036		52.7223	52.3742			52.5482	0.17406
121	11.3881	11.5607	11.7726	11.6005	11.5805	0.136685		1.79484	1.64471	1.78647	1.94917	1.7938	0.107728		53.7022	53.586	52.2522	52.5561	53.0241	0.63055
126.5	11.6985	11.4124			11.5554	0.143044		1.99629	1.81654			1.90642	0.0898761		54.3471	54.5253			54.4362	0.0890566
128.5			11.1898	11.0215	11.1056	0.0841583				2.01478	2.2059	2.11034	0.0955585				53.3246	54.1256	53.7251	0.400543
131	11.2808	10.902			11.0914	0.189406		2.09008	1.89613			1.9931	0.0969778		54.5108	54.4261			54.4684	0.042361
133	11.1401	10.6762	10.9812	10.779	10.8941	0.17946		2.11568	1.95866	2.11332	2.29853	2.12155	0.120372		54.341	54.5259	53.9861	54.7058	54.3897	0.26633
135	11.1615	10.7114			10.9364	0.225025		2.18468	1.97408			2.07938	0.1053		55.3318	55.241			55.2864	0.0453991
138			10.7233	10.5473	10.6353	0.0879553				2.18475	2.39386	2.28931	0.104555				54.6193	55.2864	54.9528	0.333592
	Tet1							Tet2							Tet3
Time	Exp.1	Exp. 2	Exp. 3	Exp. 4	Ave	Std		Exp.1	Exp. 2	Exp. 3	Exp. 4	Ave	Std		Exp.1	Exp. 2	Exp. 3	Exp. 4	Ave	Std
0	0	0	0	0	0	0		0	0	0	0	0	0		0	0	0	0	0	0
8
15	0	0			0	0		0	0			0	0		0	0			0	0
18	0	0	0	0	0	0		0	0	0	0	0	0		0	0	0	0	0	0
20	0	0	0	0	0	0		0	0	0	0	0	0		0	0	0	0	0	0
24			0	0	0	0				0	0	0	0				0	0	0	0
25	0	0			0	0		0	0			0	0		0	0			0	0
40	0	0			0	0		0	0			0	0		0	0			0	0
42			0	0	0	0				0	0	0	0				0	0	0	0
47	0	0			0	0		0	0			0	0		0	0			0	0
49			0	0	0	0				0	0	0	0				0	0	0	0
63.5	0	0			0	0		0	0			0	0		0	0			0	0
66			0	0	0	0				0	0	0	0				0	0	0	0
71	0	0	0	0	0	0		0	0	0	0	0	0		0	0	0	0	0	0
88	0	0			0	0		0	0			0	0		0	0			0	0
90			0	0	0	0				0	0	0	0				0	0	0	0
98	0	0	0	0	0	0		0	0	0	0	0	0		0	0	0	0	0	0
114			0.114706	0.112265	0.113486	0.00122054				1.11287	1.14467	1.12877	0.0158983				0.0239586	0.0215573	0.0227579	0.00120066
117	0.104759	0.129038			0.116898	0.0121396		1.15692	1.22571			1.19131	0.0343949		0.036766	0.0521056			0.0444358	0.0076698
121	0.128484	0.135986	0.120661	0.128043	0.128294	0.00542057		1.52764	1.44601	1.65305	1.70509	1.58295	0.102035		0.0869055	0.0438976	0.0131943	0	0.0359993	0.0334284
126.5	0.172348	0.128692			0.15052	0.0218282		2.01974	1.8852			1.95247	0.0672715		0.104095	0.0475672			0.0758313	0.028264
128.5			0.149541	0.14268	0.14611	0.0034306				2.31869	2.32415	2.32142	0.00273111				0.0268934	0.0167522	0.0218228	0.00507062
131	0.166442	0.146329			0.156386	0.0100562		2.29763	2.19249			2.24506	0.0525679		0.04741	0.0985835			0.0729968	0.0255867
133	0.170837	0.149504	0.149955	0.14343	0.153432	0.010374		2.36019	2.3064	2.53641	2.53078	2.43344	0.101956		0.0995342	0.0535258	0.0227697	0.0223859	0.0495539	0.0315012
135	0.17204	0.163943			0.167991	0.00404859		2.48678	2.45404			2.47041	0.0163686		0.00464282	0.0105944			0.00761863	0.00297581
138			0.201326	0.154266	0.177796	0.0235301				2.80371	2.82063	2.81217	0.00845589				0.0286039	0.0181401	0.023372	0.00523192
	Tet4							Tet5							PAPS
Time	Exp.1	Exp. 2	Exp. 3	Exp. 4	Ave	Std		Exp.1	Exp. 2	Exp. 3	Exp. 4	Ave	Std		Exp.1	Exp. 2	Exp. 3	Exp. 4	Ave	Std
0	0	0	0	0	0	0		0	0	0	0	0	0		0.832596	0.832746	0.826666	0.82941	0.830355	0.00251218
6															0.847033	0.846299	0.89911	0.822411	0.853713	0.0280191
15	0	0			0	0		0	0			0	0		2.56821	3.56852			3.06837	0.500152
18	0	0	0	0	0	0		0	0	0	0	0	0		3.25249	3.91239	2.93852	2.21414	3.07938	0.610811
20	0	0	0	0	0	0		0	0	0	0	0	0		4.03889	4.4539	3.34217	2.51201	3.58674	0.736762
24			0	0	0	0				0	0	0	0				1.70732	1.27966	1.49349	0.213831
25	0	0			0	0		0	0			0	0		1.91324	2.06201			1.98762	0.0743853
40	0	0			0	0		0	0			0	0		1.14125	1.13453			1.13789	0.00336182
42			0	0	0	0				0	0	0	0				0.993232	0.971904	0.982568	0.0106643
47	0	0			0	0		0	0			0	0		1.24301	1.27899			1.261	0.017988
49			0	0	0	0				0	0	0	0
63.5	0	0			0	0		0	0			0	0		1.51491	1.482			1.49846	0.0164564
66			0	0	0	0				0	0	0	0
71	0	0	0	0	0	0		0	0	0	0	0	0		1.47849	1.41355	1.56863	1.30727	1.44198	0.0953002
88	0	0			0	0		0	0			0	0		0.89649	0.893948			0.895219	0.00127135
90			0	0	0	0				0	0	0	0				0.895884	0.871203	0.883544	0.0123409
98	0	0	0	0	0	0		0	0	0	0	0	0		0.970396	0.941974	0.905134	0.901163	0.929667	0.0283932
117	0.0679797	0.0860336			0.0770067	0.00902695		0	0			0	0		1.11996	1.05467			1.08731	0.0326469
121	0.0888835	0.088506	0.0140047	0	0.0478486	0.0411454		0	0	0	0	0	0		1.14193	1.07304	0.992732	0.982925	1.04766	0.0646894
126.5	0.0226478	0.14049			0.0815687	0.0589209		0	0			0	0		1.1751	1.088	1.00046	0.984583	1.06204	0.0762379
128.5			0.0231893	0.0330652	0.0281273	0.00493797				0.013376	0.00572155	0.00954876	0.00382721		1.18557	1.12188	1.09469	1.05959	1.11543	0.0461213
131	0.0266412	0.195836			0.111239	0.0845975		0	0			0	0		1.19308	1.13368			1.16338	0.0296961
133	0.0293093	0.0209064	0.0353208	0.0390975	0.0311585	0.00687165		0	0	0.00672654	0.00346691	0.00254836	0.00279684		0.822411	1.14015	1.09303	1.08263	1.03455	0.124384
135	0.0359255	0.0216315			0.0287785	0.007147		0.00601012	0.00808147			0.0070458	0.00103568		1.19308	0.822411			1.00774	0.185332
138			0.0450039	0.0545979	0.0498009	0.00479705				0.0121378	0.00772355	0.00993067	0.00220713				1.04429	1.03373	1.03901	0.00528164
	Activity
Time	Exp.1	Exp. 2	Exp. 3	Exp. 4	Ave	Std
0
6
15
18
20
24
25
40
42
47
49
63.5
66
71
88
90
98
117	102	85			93.5	8.5
121	100	92	122	74	97	17.2337
126.5
128.5	116	108	137	122	120.75	10.6154
131	160	155			157.5	2.5
133	163		161	136	153.333	12.2837
135		166	178	167	170.333	5.4365
138			192	182	187	5

## Sheet: Fig. 5 a
NS
Time	Exp. 1	Exp. 2	Exp. 3	Exp. 4	Exp. 5	Exp. 6	Exp. 7	Exp. 8	Exp. 9	Exp. 10	Exp. 11	Exp. 12	Exp. 13	Exp. 14	Exp. 15	Exp. 16	Exp. 17	Exp. 18	Exp. 19	Exp. 20	Exp. 21	Exp. 22	Exp. 23	Exp. 24	Exp. 25	Exp. 26	AV	Dev
0	1.95788	1.39015	1.20507	1.34797	1.38474	1.60407	1.55581	1.3531	1.46603	1.30889	1.37945	1.28868	1.0268	1.11348	1.43337	1.60581	0	0	0	0	1.1408	1.5481	1.50924	1.71111	1.39784	1.74722	1.2106	0.552492
3	13.6435	12.9067	10.8022	11.1477	11.9227	12.1305	10.9057	9.38043	13.5779	13.1744	11.1991	11.4896	11.8729	11.7582	11.6366	13.1577	11.5587	13.5058	13.3881	13.0034	11.301	11.2436	10.7809	10.7579	9.9772	12.0582	11.857	1.12888
19	67.7352	77.9829	67.9553	69.5609	72.6574	77.8362	77.292	71.2824	78.3713	81.0304	77.8977	76.816	75.0192	78.4511	78.4248	77.1346	78.5251	80.317	80.0742	77.7802	65.6008	56.0744	55.8725	57.0828	54.3239	59.4803	71.9453	8.53602
24	77.9811	81.0066	79.8404	80.093	80.9641	81.3794	81.3749	80.9381					81.6393	81.9143	81.9617	83.3081	81.7126	81.9807	81.9433	82.0407	79.4407	70.7744	71.5749	73.0499	70.2475	73.7119	79.0399	4.07737
30		81.7282	81.3468	81.5074	81.9879	82.1429	82.2262	81.7059	82.3037	82.0571	82.0052	82.0995	82.3249	82.5035	82.5619	84.2143	82.5073	82.6147	82.6172	82.4471	81.2844	79.5286	79.7961	79.7366	77.8864	80.1973	81.6533	1.28945
43	34.087	38.0888	44.9404	43.3277	42.9595	41.6198	40.1692	42.9672	32.408	36.2223	35.9732	37.3621	35.1494	36.6219	37.2196	36.2852	36.7019	37.5885	36.1502	36.6809	49.8444	55.4945	55.0846	55.3029	56.9932	53.8245	41.8872	7.53044
50	27.2374	31.5265	35.529	34.3474	33.8661	33.9115	32.9664	34.3745	28.2835	30.2475	29.9728	30.2757	28.3589	29.5088	29.77	28.754	29.6649	30.2837	29.5049	29.5138		45.5302	44.8425	45.6556	47.6615	41.8397	33.7371	6.11707
67	23.4037	26.7254	27.4056	27.3536	26.1509	27.6015	27.2301	27.1909	25.466	26.156	25.7531	25.1447	24.1035	24.5224	24.6461	23.813	25.1441	25.4954	25.149	24.781							25.6618	1.24502
71	23.0995	26.1289	26.5892	26.5372	25.4647	26.8889	26.5444	26.5137	25.1941	24.6673	24.8369	24.648	23.8861	24.1535	24.2314	23.4708	24.662	25.0586	24.7557	24.4414	30.798	31.2686	30.4768	31.1063	32.7296	28.5166	26.4103	2.66389
96	22.2065	24.8641	24.9298	25.0837	23.8361	25.2324	25.0265	24.7786	23.6893	23.9878	23.5806	23.342	22.5253	22.6554	22.7416	22.0342	23.1342	23.1543	23.3801	22.8798	28.2725	28.0265	27.411	27.8232	28.9289	26.142	24.6026	1.98658
119	7.83352	11.5865	11.203	12.0271	10.0272	12.5214	13.075	12.5214	12.0743	11.3934	11.2896	10.5304	9.14778	9.59475	8.8658	7.43355	9.2062	10.074	10.1219	9.6855	14.5972	15.8717	15.6145	14.9969	15.4569	14.1571	11.5733	2.38135
122	6.40149					9.84561	10.2372	10.0596	8.93013	8.70091	8.32062	7.00055	6.71343	6.78411	6.82519	5.36268	8.13432	8.11564	8.66319	7.75171							7.9904	1.36169
124	6.63454					8.57575	8.81037	8.78535	7.73646	7.22558	6.81699	5.95979	5.34503	5.28801	5.7783	3.91393	7.65979	7.51899	7.82926	7.33076							6.95056	1.34488
126	5.93543					7.47262	7.47406	7.52082					5.39977	5.62327	5.09694	4.11351											6.07955	1.19815
128		6.33988	6.40681	6.99852	5.3804	6.31279	6.60493	6.59269	6.4265	5.76367	5.71812	4.97977					5.45726	4.92254	5.1446	5.23035	9.96428	10.4341	11.1852	10.4083	10.916	9.94392	7.19669	2.15978
131		5.43635	5.47663	6.11876	4.62404	5.4954	5.63372	5.77542	5.64602	5.13011	5.19195	4.87889									9.40649	8.16346	9.64117	7.91604	8.6756	8.9926	6.60016	1.69663
132.5		5.29531	5.01709	5.65496	4.1954	5.23687	5.33476	5.51531													8.09276	7.31536	8.50575	7.49354	8.34736	8.16215	6.47436	1.467
138																					7.76509	7.287	7.93519	7.34626	7.54397	7.48872	7.56104	0.226706
140																						6.61089	7.26421	6.62145	7.25612	6.97448	6.94543	0.288399
143																					6.96287	5.91559	6.22571	5.97296	5.90101		6.19563	0.40109
NS2S
0	0	0	0	0	0	0	0	0	0	0	0	0	0	0	0	0	0	0	0	0	0	0	0	0	0	0	0	0
3	0	0	0	0	0	0	0	0	0	0	0	0	0	0	0	0	0	0	0	0	0	0	0	0	0	0	0	0
19	0	0	0	0	0	0	0	0	0	0	0	0	0	0	0	0	0	0	0	0	0	0	0	0	0	0	0	0
24	0.0392621	0	0	0	0	0	0	0	0	0	0	0	0	0	0	0	0	0	0	0	0	0	0	0	0	0	0.00151008	0.00755041
30		0	0	0	0	0	0	0	0	0	0	0	0	0	0	0	0	0	0	0	0	0	0	0	0	0	0	0
43	44.8092	43.4867	36.2244	37.9861	38.7468	40.5715	41.8945	38.8254	49.7583	45.626	45.9671	44.4501	47.1396	45.8989	45.284	47.8775	45.7392	45.1331	46.625	45.9265	31.4102	24.1811	24.8356	25.1275	22.3913	26.4418	39.706	8.37489
50	52.5266	50.5403	45.9413	47.0105	47.9476	48.092	48.8798	47.3106	53.8148	51.6584	52.0831	51.7139	53.6676	52.8667	52.7736	55.2936	52.8877	52.5585	53.2347	53.0832		34.4304	35.0348	34.8201	32.4803	37.7964	47.9379	6.9616
67	55.8761	55.2744	54.093	54.3849	55.81	54.5834	55.1055	54.6223	56.8808	56.0717	56.4909	57.5324	57.9117	58.0688	57.8072	60.4271	57.7448	57.4297	57.7298	57.979						51.3882	56.3434	1.90846
71	55.9664	55.4643	54.585	54.5956	56.3869	55.2214	55.5364	55.3392	55.9166	56.7177	56.383	56.4264	58.6687	58.5519	58.5043	60.7424	58.102	57.793	58.1402	58.4065	50.4488	48.8961	49.5954	49.4354	47.1651	53.7832	55.2605	3.40286
96	57.0407	56.9045	56.5692	56.5918	58.1177	57.0883	57.2531	57.3268	57.7612	57.3412	57.8097	57.9889	60.0089	59.9819	60.0429	62.3056	59.7307	59.6643	59.4892	60.0317	53.0723	52.5193	53.2948	53.4044	51.1851	53.9487	57.172	2.7311
119	6.00919	7.32609	6.28818	6.91782	6.45174	8.04237	8.56968	8.04237	8.55454	7.58235	7.72824	6.94516	7.90071	8.4857	8.0605	7.52841	7.43126	7.55222	7.81166	7.57606	7.38451	7.29596	7.44188	6.61709	6.18054	7.61769	7.43623	0.69101
122	8.46378					7.42691	7.91908	6.71253	7.29406	3.58461	6.70199	10.731	6.91194	7.6205	6.11697	6.99789	8.31995	9.70302	7.84389	11.7359						5.63814	7.63071	1.83858
124	3.80699					6.95004	7.43318	6.20551	5.27044	3.31941	6.47497	10.5653	6.72352	7.44393	5.8471	6.7308	8.22744	8.42059	7.70958	6.90706						5.27961	6.66561	1.66826
126	5.6516					6.67177	6.89995	5.83471					6.92942	7.32801	7.09675	6.71841										5.04865	6.46436	0.724236
128		5.6535	5.10816	5.50998	5.70642	6.36278	6.90665	5.67697	6.5552	6.37113	6.88818	6.36951					7.4754	7.08935	7.22167	7.25607	4.67091	3.99321	4.49036	4.52734	3.31553	4.90443	5.81204	1.15492
131		5.5492	5.00174	5.33306	5.35711	6.41932	6.66312	5.38279	7.10487	6.45759	6.8129	6.28557									4.5182	3.45089	3.98328	3.86737	6.47945	4.76391	5.4959	1.08394
132.5		5.82616	5.11486	5.2962	5.32382	6.31841	6.81676	6.02773													4.08485	3.23803	3.61421	3.84982	2.90269		4.86779	1.23685
138																					4.02545	3.22963	3.15732	3.80243	7.36468		4.3159	1.55983
140																						3.25432	3.67748	3.62964	2.01812		3.14489	0.670861
143																					3.86388	3.13318	3.38826	3.34947	2.98161		3.34328	0.299345
TriS
0	0	0	0	0	0	0	0	0	0	0	0	0	0	0	0	0	0	0	0	0	0	0	0	0	0	0	0	0
3	0	0	0	0	0	0	0	0	0	0	0	0	0	0	0	0	0	0	0	0	0	0	0	0	0	0	0	0
19	0	0	0	0	0	0	0	0	0	0	0	0	0	0	0	0	0	0	0	0	0	0	0	0	0	0	0	0
24	0	0	0	0	0	0	0	0	0	0	0	0	0	0	0	0	0	0	0	0	0	0	0	0	0	0	0	0
30																					0	0	0	0	0	0	0	0
43	0	0	0	0	0	0	0	0	0	0	0	0	0	0	0	0	0	0	0	0	0	0	0	0	0	0	0	0
50	0	0	0	0	0	0	0	0	0	0	0	0	0	0	0	0	0	0	0	0		0	0	0	0	0	0	0
67	0	0	0	0	0	0	0	0	0	0	0	0	0	0	0	0	0	0	0	0	0	0	0	0	0	0	0	0
71	0	0	0	0	0	0	0	0	0	0	0	0	0	0	0	0	0	0	0	0	0	0	0	0	0	0	0	0
96	0	0	0	0	0	0	0	0	0	0	0	0	0	0	0	0	0	0	0	0	0	0	0	0	0	0	0	0
119	50.3757	49.7781	50.4506	49.853	52.2609	49.3675	48.7218	49.3675	49.969	50.1751	50.5347	51.3412	52.9076	52.5466	52.8264	55.2641	54.6964	54.3726	54.3497	54.774	45.8802	45.6883	46.3354	47.3558	45.9128	46.6896	50.4536	2.92141
122	51.6064					48.4356	48.554	49.9659	49.5357	54.4575	51.4596	55.364	52.7577	52.2782		56.5231	54.3022	53.7847	55.0547	54.4122							52.5661	2.4837
124	54.7764					49.8977	49.6311	52.0856	52.9804	54.7397	54.3335	57.6001	54.7209	54.5213		59.0128	55.2735	55.5023	56.3914	57.7792							54.6164	2.56832
126	54.5062					51.266	50.119	53.0725					58.271	57.0725	57.7989	60.9796											55.3857	3.51994
128		51.7977	53.1159	52.4437	56.6024	51.2978	52.4553	54.6652	52.9793	53.3141	54.807	55.6838					57.484	58.2462	57.2425	57.7083	49.9791	51.9808	52.3393	53.7195	51.9578	51.3967	53.8674	2.37095
131		53.5048	54.6174	53.5979	55.5155	52.8046	52.9323	54.2989	57.48	56.4408	58.0904	58.7458									50.5719	53.5858	54.8298	55.0685	53.8552	52.5976	54.6198	2.0619
132.5		58.3233	58.8359	58.4491	60.6983	57.0537	57.7177	56.9887													52.2003	55.1342	56.0694	55.9694	55.7222	53.6191	56.6755	2.17604
138																					52.5817	55.1148	56.5838	57.0944	54.7504	54.0766	55.0336	1.50913
140																						56.0586	56.944	57.5341	58.3918	56.1363	57.013	0.878282
143																					53.5844	56.979	57.1791	57.5739	56.3439		56.3321	1.43024
Tet2
0
3
19
24
43
50
67
71
96
119	0	0	0	0	0	0	0	0	0	0	0	0	0	0	0	0	0	0	0	0	0	0	0	0	0	0	0	0
122	0.864615					0.190521	0.122035	0.222188	0.25349	0.481377	0.380632	0.549151	0.792161	0.667276	0.79565	0.820658	0.765512	0.526163	0.383393	0.592723							0.525472	0.238891
124	1.48922					0.56438	0.459338	0.551625	0.833551	1.17721	1.17008	1.14525	1.67357	1.63948	1.46715	1.69811	1.24634	0.929085	0.747232	1.03509							1.11417	0.397026
126	2.21459					0.90928	0.801377	0.948129					2.35304	2.1295	2.43787	2.50218											1.78699	0.707212
128		1.31657	1.65115	1.17049	1.95047	1.3144	1.29054	1.42101	1.32906	1.82081	1.94816	2.31291					2.72346	3.04826	2.9088	2.8657	0.533766	0.577169	0.358652	0.522596	0.606096	0.643212	1.53873	0.837657
131		1.85933	2.23887	1.63742	2.4497	1.74229	1.66719	1.79463	2.26308	2.48754	2.62852	2.81611									0.654161	0.927524	0.700003	0.878469	0.932248	1.08756	1.69204	0.69737
132.5		2.63752	2.94447	2.46092	3.4139	2.4018	2.41768	2.25546													0.914714	1.26814	0.999677	1.23731	1.21208	1.38528	1.9653	0.793727
138																					1.13023	1.55743	1.48274	1.52853	1.37493	1.65882	1.45545	0.168373
140																						1.8217	1.65644	1.62392	1.69429	2.05009	1.76929	0.15562
143																					1.36634	2.31643	2.12776	2.15952	2.37032		2.06808	0.362597

## Sheet: Fig. 5 b
Time	NH2	0S	NS	6S	2S	NS6S	NS2S	2S6S	TriS	tet1	tet2	tet3	tet4	tet5		Age	NS	NS2S	TriS	Tet2
0																0
3	62.731	19.34	17.929													3	17.929
18	2.603	16.374	81.023													18	81.023
20	2.307	16.329	81.364													20	81.364
24	1.853	16.535	81.611													24	81.611
27	1.748	16.723	81.528													27	81.528	0
48	1.544	15.812	29.956		0.372		52.316									48	29.956	52.316
72	1.26	15.141	24.189		1.026		58.384									72	24.189	58.384
95	1.308	15.091	22.745		1.475		59.381									95	22.745	59.381	0
106	1.194	12.556	16.264	2.221	1.151	6.097	21.516	0	39.001							106	16.264	21.516	39.001
116	1.098	8.267	11.33	6.058	1.091	10.674	7.864	0	53.617							116	11.33	7.864	53.617
119	1.103	6.664	9.235	7.831	0.989	12.553	6.453	0	55.171							119	9.235	6.453	55.171
124	1.699	6.254	7.182	7.902	0.862	13.977	6.116	0.337	55.168	0.112	0.391	0	0	0		124	7.182	6.116	55.168	0.391
126	1.705	6.804	6.167	7.597	0.775	14.063	6.53	0.397	55.116	0.163	0.682	0	0	0		126	6.167	6.53	55.116	0.682
128	1.611	6.179	5.506	7.52	0.729	14.272	5.931	0.457	56.545	0.196	1.054	0	0	0		128	5.506	5.931	56.545	1.054
130	1.579	5.931	4.734	7.519	0.682	14.507	5.791	0.531	56.996	0.223	1.507	0	0	0		130	4.734	5.791	56.996	1.507
132	1.648	6.233	4.114	7.183	0.635	14.438	5.601	0.581	57.33	0.212	1.919	0.108	0	0		132	4.114	5.601	57.33	1.919
134	1.553	5.455	3.641	6.915	0.581	14.616	5.722	0.66	58.084	0.238	2.419	0.116	0	0		134	3.641	5.722	58.084	2.419
136	1.644	4.291	3.15	6.823	0.601	14.604	5.632	0.709	59.231	0.233	2.828	0.184	0.054	0.017		136	3.15	5.632	59.231	2.828
138	1.284	3.992	2.867	6.624	0.583	14.115	5.648	0.499	60.677	0.225	3.213	0.195	0.059	0.018		138	2.867	5.648	60.677	3.213
139	1.272	3.925	2.608	6.17	0.557	13.757	5.915	0.643	60.574	0.278	3.796	0.297	0.184	0.024		139	2.608	5.915	60.574	3.796

## Sheet: Ext. Fig. 1 b
Time	Batch1		Batch2		Batch3			Ave	Dev	Ave	Dev
	OD	Titer	OD	Titer	OD	Titer		OD		Titer
0	0		0		0			0	0
13	18.9		19.4		19.2			19.1667	0.251661
24	49.4	2.59641	55.1	2.03119	51.3	2.43868		51.9333	2.9023	2.35543	0.291661
36	69.4	6.48169	71.5	5.66487	69.9	5.99629		70.2667	1.09697	6.04762	0.410823
48	76.8	9.94311	79.5	9.51697	78.3	8.87091		78.2	1.35277	9.44366	0.539849
59	81.6	11.7276	82.9	11.8642	75.2	10.8766		79.9	4.12189	11.4894	0.535119

## Sheet: Ext .Fig. 2 b
		%
	Time (h)	amine	0S	NS
with Xylene	1	81.7639	18.0639	0.172166
	6	79.2826	16.0674	4.65
	20	75.8687	16.9216	7.20973
without Xylene	1	82.1279	17.8116	0.0604747
	6	82.1336	17.7176	0.14878
	20	81.6099	18.2414	0.148754

## Sheet: Ext. Fig. 3
Time	NH2	0S	NS	6S	2S	NS6S	NS2S	2S6S	TriS	tet1	tet2	tet3	tet4	tet5
3	53.0552	16.3803	23.6482	0.262465	0.0712117	5.99672	0.243111	0	0.342866	0	0	0	0	0
10	6.86661	14.2123	46.4149	0.374251	0.0845	15.9965	14.3867	0	1.44539	0	0	0.0889242	0.129979	0
15	3.89889	13.6053	28.6326	0.631293	0.149406	23.3726	24.9645	0	4.15996	0	0	0.213735	0.37165	0
20	2.97081	12.8648	22.6465	0.873101	0.304393	25.6147	25.4366	0	7.90248	0.134248	0	0.385035	0.867313	0
30	1.76049	12.3449	18.6429	1.08066	0.510684	26.1362	21.7371	0.921109	13.9328	0.337433	0	0.725435	1.87019	0
40	1.6085	11.6765	16.0172	1.20735	0.650533	26.0901	17.4831	1.37068	18.9188	1.37068	0.0482293	0.952819	2.60543	0
50	1.47798	11.4254	14.5936	1.34883	0.73278	26.449	14.6416	1.60536	22.6746	0.707615	0.0924763	1.10968	3.14112	0

## Sheet: Sup. Fig. 1
	0S	NS	6S	2S	NS6S	NS2S	2S6S	TriS	tet1	tet2	tet3	tet4	tet5
KM101-1 x 0.6	3.144	4.324	2.262	0.353	11.908	3.848	0.193	57.537	0.891	3.34	0	0.19	0
Control	1.472	2.295	1.929	0.501	9.153	5.46	0.921	62.801	0.351	4.546	0	0.747	0
KM101-1 x 1.4	1.581	2.074	1.947	0.574	9.332	6.542	1.134	64.417	0.302	4.571	0	0.777	0.161
KM33(NST) x 0.7	2.479	2.11	5.855	0.267	14.489	4.188	1.508	64.258	0	2.605	0	0	0
KM34(C5) x 0.6	3.864	4.58	3.944	0.618	15.23	6.356	0.218	58.587	0.818	2.83	0.208	0	0.116
Control	3.378	3.239	3.403	0.592	13.256	5.271	0.344	62.388	0.918	3.686	0.094	0.242	0.141
KM34(C5) x 1,2	3.806	3.901	3.353	0.874	12.197	6.625	0.471	64.055	0.975	3.243	0	0.313	0.187
KM36(6OST) x 0.6	4.184	4.934	3.162	1.024	11.664	7.114	0.347	59.924	1.284	2.318	0	0.212	0.123
Control	3.65	3.985	3.496	0.707	13.27	6.109	0.293	62.302	0.952	2.782	0	0.156	0.104
KM36(6OST) x 1.4	3.026	2.677	3.474	0.553	13.659	5.555	0.415	63.967	0.612	3.995	0	0.16	0.135
KM34(2OST) x 1.4	3.263	3.603	3.62	0.604	12.694	3.987	1.591	61.726	0.673	3.653	0	0	0
Control	2.334	1.717	3.395	0.252	12.827	2.839	1.651	63.663	0.263	5.738	0.142	0	0.233
KM34(2OST) x 0.6	2.851	2.629	3.879	0.293	14.376	2.69	1.459	61.98	0.534	4.729	0.154	0	0.132
Control	3.731	3.921	3.348	0.767	12.224	6.332	0.374	61.085	0.941	2.975	0	0.251	0.134
